# PSL-Recommender: Protein Subcellular Localization Prediction using Recommender System

Ruhollah Jamali<sup>a</sup>, Changiz Eslahchi<sup>b,\*</sup>, Soheil Jahangiri-Tazehkand<sup>a,c,\*</sup>

<sup>a</sup>*School of Biological Sciences, Institute for Research in Fundamental Sciences(IPM), Tehran, Iran.*

<sup>b</sup>*Department of Computer Science, Faculty of Mathematical Sciences, Shahid Beheshti University, Tehran, Iran*

<sup>c</sup>*Princess Margaret Cancer Centre, University Health Network, 101 College Street, Toronto, ON, M5G1L7, Canada*

---

## Abstract

Identifying a protein's subcellular location is of great interest for understanding its function and behavior within the cell. In the last decade, many computational approaches have been proposed as a surrogate for expensive and inefficient wet-lab methods that are used for protein subcellular localization. Yet, there is still much room for improving the prediction accuracy of these methods.

PSL-Recommender (Protein subcellular location recommender) is a method that employs neighborhood regularized logistic matrix factorization to build a recommender system for protein subcellular localization. The effectiveness of PSL-Recommender method is benchmarked on one human and three animals datasets. The results indicate that the PSL-Recommender significantly outperforms state-of-the-art methods, improving the previous best method up to 31% in F1 – mean, up to 28% in ACC, and up to 47% in AVG. The source of datasets and codes are available at: <https://github.com/RJamali/PSL-Recommender>

*Keywords:* Molecular biology, Recommender systems, Proteins subcellular location

*2010 MSC:* 00-01, 99-00

---

\*Corresponding authors

*Email addresses:* [ch-eslahchi@sbu.ac.ir](mailto:ch-eslahchi@sbu.ac.ir) (Changiz Eslahchi),  
[soheil.jahangiri@uhnresearch.ca](mailto:soheil.jahangiri@uhnresearch.ca) (Soheil Jahangiri-Tazehkand)

## 1. Introduction

Proteins are responsible for a wide range of functions within cells. The functionality of a protein is entangled with its subcellular location. Therefore, identifying Protein Subcellular Localization (PSL) is of great importance for both biologists and pharmacists, helping them inferring a protein's function and identifying drug-target interactions [1]. Recent advances in genomics and proteomics provide massive amount of protein sequence data extending the gap between sequence and annotation data. Although PSLs can be identified by experimental methods, these methods are laborious and time-consuming explaining why only a narrow range of PSL information in Swiss-Prot database has been verified in this manner [2]. This problem augments the demand for accurate computational prediction methods. Developments of computational and machine learning techniques have provided fast and effective methods for PSL prediction [2–5, 5–23].

The desired PSL prediction can be reached typically by relying on sequence-derived features, taking into consideration that using annotation-derived features can lead up to better performance. Different types of sequence-derived features have been used for PSL prediction. For example, PSORT [24], WoLF PSORT [4] and TargetP [25] employ sequence sorting signals [9] while Cell-Ploc [10] and LOCSVMPSI [11] use position specific scoring matrix [26]. Additionally, amino/pseudo-amino acid composition information [12, 27] is utilized by ngLOC [13]. There are also some methods that employ combinations of sequence based features [3, 4]. Alongside, there are different types of annotation derived features such as protein-protein interaction, Gene Ontology (GO) terms and functional domain and motifs which are used by different methods [2, 7, 8, 17–20]. Moreover, text-based features derived by literature mining have also been employed beside other features for protein subcellular localization [14–16].

Parallel to the importance of features, selecting a suitable algorithm definitely leads to a higher accuracy in prediction. Many machine learning methods or statistical inferences are applied for the protein subcellular localization prob-

lem, such as support vector machine [2, 3], K-nearest neighbors [21, 22], and Bayesian methods [6, 23].

In this paper, we have modeled the PSL prediction problem as a recommendation task that aims to suggest a list of subcellular locations to a new protein. In general, Recommendation systems are methods and techniques that suggest users a preferred list of items (e.g. suggesting a movie to watch or suggesting an item to purchase) based on a previous knowledge about relations within and between items and users [28]. As of late framework strategies, recommendation systems have been utilized to predict associations in challenging bioinformatics problems [29–32]. Well-known PSL prediction methods assign equal importance to all proteins information in both constructing model and prediction tasks [2, 5, 6, 33], but utilization prioritized information from similar proteins in model construction step is likely more meaningful. Additionally, due to large number of protein features, dimension reduction methods which capture dependencies among proteins and subcellular locations could be useful to construct a PSL prediction model. In order to considering these concepts, our method, "PSL-Recommender" employs a probabilistic recommender system to predict the presence probability of a protein in a subcellular location. PSL-Recommender utilized both prioritized information to elucidate the importance of sharing similarity information over proteins, and low-dimensional latent space projection of protein features during PSL prediction process.

PSL-Recommender employs logistic matrix factorization technique [34] integrated with a neighborhood regularization method to capture the information from a set of previously known protein-subcellular location relations. Then, it utilizes this information to predict the presence probability of a new protein in a subcellular location using a logistic function. Logistic Matrix factorization has shown promising results for problems such as music recommendation [35], drug-target interaction prediction [29, 36], and lncRNA-protein interaction prediction [30]. However, to the best of our knowledge, it has not been used in PSL prediction problem.

By evaluating on different benchmark datasets, we have shown that PSL-Recommender

significantly outperforms the results of current state-of-art methods.

## 2. Materials and Method

### 2.1. Method

65 To recommend a subcellular position to a protein, PSL-Recommender employs two matrices; a matrix of currently known protein-subcellular location assignments(PSL interactions) and a similarity matrix between proteins. The proteins similarity matrix is the weighted average of similarity measures such as GO terms [37] similarities, PSSM [38] similarity and STRING [39] similarity.  
70 The main idea is to model the localization probability of a protein in a location as a logistic function of two latent matrices. The latent matrices are acquired by matrix factorization of the protein-subcellular location matrix with respect to the similarity matrices. Construction pipeline of PSL-Recommender predictor has been demonstrated in Fig 1. The details of similarity measures and the  
75 recommender system are as follows.

#### 2.1.1. PSSM similarity

The PSSM similarity matrix,  $S^{PSSM} = [s_{i,j}^{PSSM}]_{n \times n}$ , contains the pairwise global alignment scores of proteins that are calculated using the position specific scoring matrices (PSSM). Accordingly, to compute the  $s_{i,j}^{PSSM}$  of proteins  $i$  and  
80  $j$ , first for each protein, PSI-BLAST [40] with e-value 0.001 is used to search the Swiss-Prot database to obtain each protein's PSSM. Then  $i$  and  $j$  are globally aligned twice, once using the PSSM of  $i$  and once using the PSSM of  $j$ . Finally,  $s_{i,j}^{PSSM}$  is obtained by the mean of reciprocal alignment scores. The PSSM similarity matrix is normalized using unity based normalization.

#### 85 2.1.2. STRING similarity

It has been shown that two interacting proteins have a higher chance to be in the same subcellular location [8, 18, 41]. Accordingly, we extracted the interaction score of all pairs of proteins from STRING (Ver. 10.5) to construct the proteins interaction scoring matrix. If no interaction was available for a pair

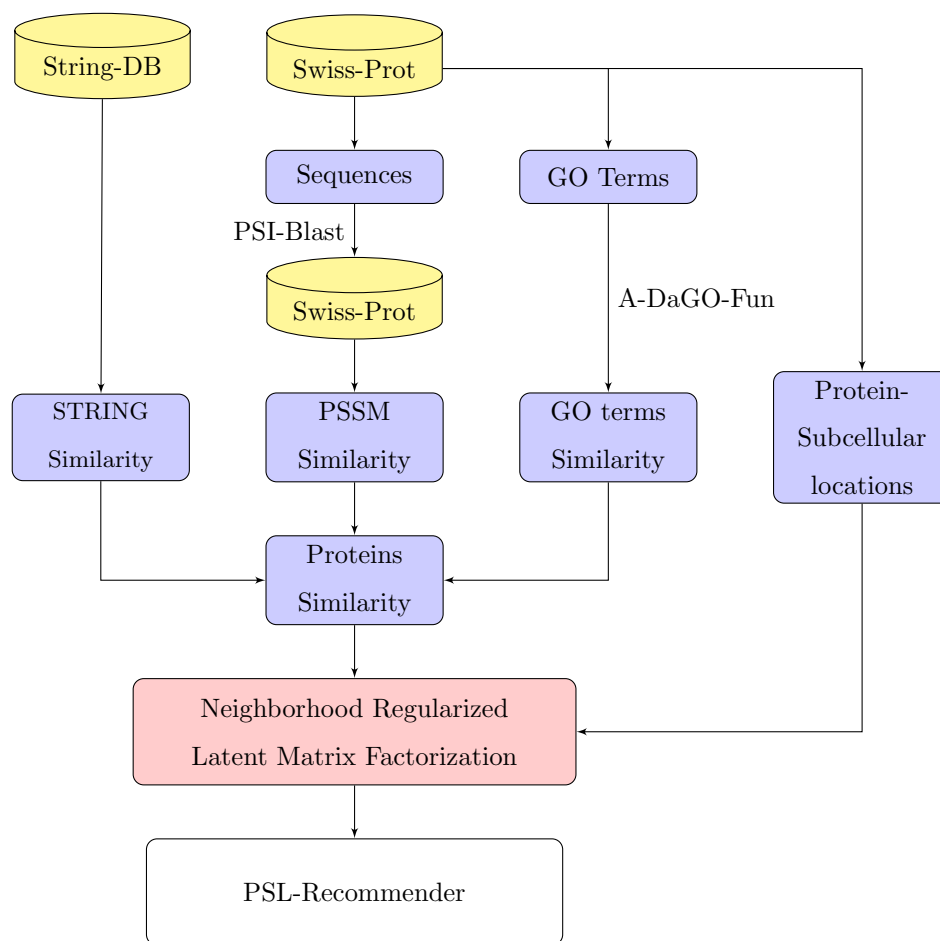

Figure 1: Construction pipeline of PSL-Recommendation

90 of proteins, we set their interaction score to zero. Since the STRING protein-protein interaction scores are in the range of  $[0, 999]$ , we normalized the scores with unity-base normalization.

### 2.1.3. Semantic similarity of GO terms

Gene Ontology terms are valuable sources of information for predicting sub-  
 95 cellular localization [2, 42]. To exploit GO terms similarities, we first extracted GO molecular function, biological process and cellular component terms from Swiss-Prot database. Then we used A-DaGO-Fun to extract the BMA-based

Resnik GO terms semantic similarities [43]. Similarities were normalized using unity-based normalization.

100 *2.1.4. PSL-Recommender*

Let proteins and subcellular locations sets be denoted by  $X$  and  $Y$ , respectively and  $|X| = m$  and  $|Y| = n$ . Moreover, let  $S^p = [s_{i,k}^p]_{m \times m}$  represent the similarity of proteins. The presence of proteins in subcellular locations is also denoted by a binary matrix  $L = [l_{ij}]_{m \times n}$ , where,  $l_{ij} = 1$  if proteins  $i$  has been experimentally observed in subcellular location  $j$  and  $l_{ij} = 0$  otherwise.

The localization probability of the protein  $i$  in subcellular location  $j$  can be modeled as a logistic function as follows:

$$p_{ij} = \frac{\exp(u_i v_j^T + \beta_i^p + \beta_j^l)}{1 + \exp(u_i v_j^T + \beta_i^p + \beta_j^l)}. \quad (1)$$

In Eq.(1),  $u_i \in \mathbb{R}^{1 \times d}$  and  $v_j \in \mathbb{R}^{1 \times d}$  are two latent vectors that reflect the properties of protein  $i$  and subcellular location  $j$  in a shared latent space of size  $d < \min(m, n)$ . However, in our case matrix  $L$  is biased toward some proteins and subcellular locations, meaning that some proteins tend to localize in many locations and some subcellular locations include many proteins. Accordingly, for each protein and subcellular location we introduce a latent term to capture this bias. In Eq.(1),  $\beta_i^p$  represent the bias factor for protein  $i$  and  $\beta_j^l$  represent the bias factor for subcellular location  $j$ .

Now the goal is to acquire the latent factors for a given  $L$ . Suppose  $U \in \mathbb{R}^{m \times d}$ ,  $V \in \mathbb{R}^{n \times d}$ ,  $\beta^p \in \mathbb{R}^{m \times 1}$  and  $\beta^l \in \mathbb{R}^{n \times 1}$  denote the latent matrices and bias vectors for proteins and subcellular locations. According to the Bayes' theorem and the independence of  $U$  and  $V$  we have:

$$p(U, V, \beta^p, \beta^l | L) \propto p(L | U, V, \beta^p, \beta^l) \times p(U) \times p(V) \quad (2)$$

On the other hand, by assuming that all entries of  $L$  are independent, we have:

$$p(L | U, V, \beta^p, \beta^l) = \prod_{i=1}^m \prod_{j=1}^n p_{ij}^{l_{ij}} (1 - p_{ij})^{(1-l_{ij})}, \quad (3)$$

where  $c$  is weighting factor on positive observations, since we have more confidence on positive observations than negative ones. Also, by placing a zero-mean spherical Gaussian prior on latent vectors of proteins and subcellular locations we have:

$$p(U|\sigma_p^2) = \prod_{i=1}^m \mathcal{N}(u_i|0, \sigma_p^2 I), p(V|\sigma_l^2) = \prod_{j=1}^n \mathcal{N}(v_j|0, \sigma_l^2 I), \quad (4)$$

where  $\sigma_p^2$  and  $\sigma_l^2$  are parameters controlling the variances of prior distributions and  $I$  denotes the identity matrix. According to the above equations, the log of the posterior is yielded as follows:

$$\begin{aligned} \log p(U, V, \beta|L, \sigma_p^2, \sigma_l^2) &= \sum_{i=1}^m \sum_{j=1}^n [cl_{ij} (u_i v_j^T + \beta_i + \beta_j) \\ &\quad - (1 + cl_{ij} - l_{ij}) \log [1 + \exp(u_i v_j^T + \beta_i + \beta_j)]] \\ &\quad - \frac{\lambda_p}{2} \sum_{i=1}^m \|u_i\|_2^2 - \frac{\lambda_l}{2} \sum_{j=1}^n \|v_j\|_2^2 + C, \end{aligned} \quad (5)$$

where  $\lambda_p = \frac{1}{\sigma_p^2}$ ,  $\lambda_l = \frac{1}{\sigma_l^2}$  and  $c$  is a constant term independent of the model parameters. Our goal is to learn  $U$ ,  $V$ ,  $\beta^p$  and  $\beta^l$  that maximize the log posterior above, which is equal to minimizing the following objective function:

$$\begin{aligned} \min_{U, V, \beta^p, \beta^l} &\sum_{i=1}^m \sum_{j=1}^n (1 + cl_{ij} - l_{ij}) \log [1 + \exp(u_i v_j^T + \beta_i + \beta_j)] \\ &\quad - cl_{ij} (u_i v_j^T + \beta_i + \beta_j) + \frac{\lambda_p}{2} \sum_{i=1}^m \|u_i\|_F^2 - \frac{\lambda_l}{2} \sum_{j=1}^n \|v_j\|_F^2, \end{aligned} \quad (6)$$

where  $\|\cdot\|_F$  denotes the Frobenius norm of a matrix. By minimizing the above function  $U$ ,  $V$  and  $\beta$  can effectively capture the information of protein localizations. However, we can further improve the model by incorporating protein similarities as suggested by [29]. This process is known as neighborhood regularization. This is done by regularizing the latent vectors of proteins such that the distance between a protein and its similar proteins is minimized in the latent space.

Accordingly, suppose that the set of  $k_1$  most similar neighbors to protein  $x_i$  is

denoted by  $N_{k_1}(x_i) \subseteq X - x_i$ . We constructed adjacency matrix  $A = [a_{ij}]_{m \times m}$  that represents proteins neighborhood information as follows:

$$a_{ij} = \begin{cases} s_{ij}^p & \text{if } x_j \in N(x_i) \\ 0 & \text{otherwise} \end{cases} \quad (7)$$

To minimize the distance between proteins and their  $k$  most similar proteins we minimize the following objective function:

$$\frac{\alpha}{2} \sum_{i=1}^m \sum_{j=1}^m a_{ij} \|u_i - u_j\|_F^2 = \frac{\alpha}{2} \text{tr}(U^T H^p U), \quad (8)$$

where  $H^p = (B^p + \tilde{B}^p) - (A + A^T)$  and  $\text{tr}(\cdot)$  is the trace of matrix. In this equation,  $B^p$  and  $\tilde{B}^p$  are two diagonal matrices, that their diagonal elements are  $B_{ii}^p = \sum_{j=1}^m a_{ij}$  and  $\tilde{B}_{jj}^p = \sum_{i=1}^m a_{ij}$ , respectively.

Finally by plugging Eq.(8) into Eq.(6) we will have the following:

$$\begin{aligned} & \min_{U, V, \beta^p, \beta^l} \sum_{i=1}^m \sum_{j=1}^n c_{ij} (u_i v_j^T + \beta_i + \beta_j) \\ & - (1 + c_{ij} - l_{ij}) \log [1 + \exp(u_i v_j^T + \beta_i + \beta_j)] \\ & - \frac{1}{2} \text{tr} [U^t (\lambda_p I + \alpha H^p) U] - \frac{\lambda_l}{2} \sum_{j=1}^n \|v_j\|_F^2. \end{aligned} \quad (9)$$

A local minimum of above function can be found by employing the alternating  
105 gradient descent method. In each iteration of the gradient descent, first  $U$  and  $\beta_i$  are fixed to compute  $V$  and  $\beta_j$  and then  $V$  and  $\beta_j$  are fixed to compute  $U$  and  $\beta_i$ . To accelerate the convergence, we have employed the AdaGrad [44] algorithm to choose the gradient step size in each iteration adaptively. The



partial gradients of latent vectors and biases are given by:

$$\begin{aligned}
 \frac{\partial F}{\partial u_i} &= \sum_{j=1}^n cl_{ij}v_j^T - \frac{v_j^T(1+cl_{ij}-l_{ij})\exp(u_iv_j^T+\beta_i+\beta_j)}{1+\exp(u_iv_j^T+\beta_i+\beta_j)} - (\lambda_p u_i + \alpha H_{ij}^p u_i), \\
 \frac{\partial F}{\partial \beta_i} &= \sum_{j=1}^n cl_{ij} - \frac{(1+cl_{ij}-l_{ij})\exp(u_iv_j^T+\beta_i+\beta_j)}{1+\exp(u_iv_j^T+\beta_i+\beta_j)}, \\
 \frac{\partial F}{\partial v_j} &= \sum_{i=1}^m cl_{ij}u_i - \frac{u_i(1+cl_{ij}-l_{ij})\exp(u_iv_j^T+\beta_i+\beta_j)}{1+\exp(u_iv_j^T+\beta_i+\beta_j)} - \lambda_l v_j, \\
 \frac{\partial F}{\partial \beta_j} &= \sum_{i=1}^m cl_{ij} - \frac{(1+cl_{ij}-l_{ij})\exp(u_iv_j^T+\beta_i+\beta_j)}{1+\exp(u_iv_j^T+\beta_i+\beta_j)}.
 \end{aligned}
 \tag{10}$$

Once the latent matrices  $U$ ,  $V$ ,  $\beta_i$  and  $\beta_j$  are calculated, the presence probability of a protein  $i$  in a subcellular location can be estimated by the logistic function in formula 1. However for a new protein the latent factors  $u$  and  $b$  are not available. Hence, for a new protein the presence probability in subcellular location  $j$  is estimated as follows:

$$p_{ij} = \frac{\exp(\tilde{u}_i v_j^T + \beta_i^p + \beta_j^l)}{1 + \exp(\tilde{u}_i v_j^T + \beta_i^p + \beta_j^l)},
 \tag{11}$$

where  $\tilde{u}_i$  is the weighted average of the latent vectors of  $k_2$  nearest neighbors of  $i$ , as follows:

$$\tilde{u}_i = \frac{\sum_{k \in N(x_i)} s_{i,k}^p u_k}{\sum_{k \in N(x_i)} s_{i,k}^p}.
 \tag{12}$$

110 Eventually a threshold can be applied on probabilities to assign the subcellular locations to proteins.

## 2.2. Datasets and evaluation criteria

Evaluating the protein subcellular prediction methods is a challenging task. In one hand, the standalone version of state-of-the-art methods are not available and on the other hand, the protein databases are updated quickly. Hence, to  
 115 achieve a fair evaluation and comparison we have employed the same datasets and evaluation criteria as used in previous studies [2, 5, 6]. These datasets are summarized in Table ?? . The Hum-mploc3.0, the BaCelLo IDS animals[45], and

the Höglund IDS[33] datasets consist of two non-overlapping subsets for training  
120 and testing purposes while for DBMloc we have performed 5-fold cross valida-  
tion. The training set of Hum-mploc 3.0, HumB, is constructed from Swiss-Prot  
database release 2012\_01 (January 2012) and consists of 3122 proteins of which  
1023 proteins are labeled with more than one subcellular locations and the rest  
are single location proteins. Alongside HumB, HumT is used as the testing set  
125 to evaluate the method’s performance. HumT is also constructed from Swiss-  
Prot database release 2015\_05 (May 2015 release) and consists of 379 proteins of  
which 120 proteins are labeled with more than one subcellular locations and the  
rest are single location proteins. Each protein in Hum-mploc 3.0 is assigned to  
at least one of 12 subcellular locations (Centrosome, Cytoplasm, Cytoskeleton,  
130 Endoplasmic reticulum, Endosome, Extracellular, Golgi apparatus, Lysosome,  
Mitochondrion, Nucleus, Peroxisome, and Plasma membrane).

The training set of BaCelLo IDS animals dataset is extracted from Swiss-Prot  
release 48 (September 2005 release) containing 2597 single label proteins, while  
the testing set consists of 576 single label proteins extracted from Swiss-Prot  
135 between release 49 and 54 (February 2006 and July 2007 releases). Each pro-  
tein in BaCelLo IDS animal dataset is assigned one of four subcellular locations  
(Cytoplasm, Mitochondrion, Nucleus, and Secreted).

In the Höglund IDS dataset, the training set contains 5959 single label proteins  
extracted from Swiss-Prot release 42 and includes nine subcellular locations  
140 (Nucleus, Cytoplasm, Mitochondrion, Endoplasmic reticulum, Golgi apparatus,  
Peroxisome, Plasma membrane, Extracellular space, Lysosome, and Vacuole)

|                 | Hum-mPLoc 3.0 |      | BaCelLo |      | Höglund |      | DBMloc |
|-----------------|---------------|------|---------|------|---------|------|--------|
|                 | Train         | Test | Train   | Test | Train   | Test | All    |
| Proteins count  | 3129          | 379  | 2597    | 576  | 5959    | 158  | 3056   |
| Labels count    | 4229          | 541  | 2597    | 576  | 5959    | 158  | 6112   |
| Locations count |               | 12   |         | 4    |         | 6    | 6      |

Table 1: Datasets summary

while the testing set contains 158 single label proteins extracted from Swiss-Prot release 55.3 including six subcellular locations (Endoplasmic reticulum, Golgi apparatus, Peroxisome, Plasma membrane, Extracellular space, and Lysosome).

145 Accordingly, to train PSL-Recommender we only used 2682 proteins of training set that their subcellular location existed in the test set.

Unlike the previous datasets, the DBMLoc dataset does not have a separate training and testing dataset. This dataset contains 3054 double locational proteins with paired subcellular locations: (cytoplasm and nucleus), (extracellular and plasma membrane), (cytoplasm and plasma membrane), (cytoplasm and mitochondrion), (nucleus and mitochondrion), (endoplasmic reticulum and extracellular) and (extracellular and nucleus). We have performed 5-fold cross validation technique to produce training and testing sets on this dataset.

We assessed PSL-Recommender performance against other methods by using customized ACC and F1 – mean over subcellular locations for evaluation of multi-label classification performance methods which is introduced by [46] and used by other state-of-the-art methods for this problem. ACC is the average of  $ACC_{x_i}$  of all proteins in the test set, calculated for each protein as follows:

$$ACC_{x_i} = \frac{TP_{x_i}}{TP_{x_i} + FP_{x_i} + FN_{x_i}}, \quad (13)$$

where,  $TP_{x_i}$ ,  $FP_{x_i}$ , and  $FN_{x_i}$  are number of true positive prediction, number of false positive predictions, and number of false negative predictions for protein  $x_i$ , respectively.

The F1 – mean is the average of  $F1_{y_j}$  of all subcellular locations, where F1 of subcellular location  $y_j$  is the harmonic mean of  $Precision_{y_j}$  and  $Recall_{y_j}$ , defined as follows:

$$\begin{aligned} Precision_{y_j} &= \frac{\sum_{\{x_i \in R_j\}} \frac{TP_{x_i}}{TP_{x_i} + FP_{x_i}}}{|R_j|}, \\ Recall_{y_j} &= \frac{\sum_{\{x_i \in T_j\}} \frac{TP_{x_i}}{TP_{x_i} + FN_{x_i}}}{|T_j|}, \\ F1_{y_j} &= \frac{2 \times Precision_{y_j} \times Recall_{y_j}}{Precision_{y_j} + Recall_{y_j}}, \end{aligned} \quad (14)$$

where,  $R_j$  and  $T_j$  are sets of predicted proteins for location  $y_j$  and true proteins for location  $y_j$ , respectively.

Alongside, SherLoc2 [5] applied two other evaluation criterias, named ACC2 (ratio of correctly predicted proteins) and AVG (average fraction of called instances) which are defined as follow:

$$\begin{aligned} \text{ACC2} &= \frac{tp + tn}{tp + tn + fp + fn}, \\ \text{AVG} &= \frac{1}{d} \sum_{i=1}^d \frac{tp_i}{tp_i + fn_i}, \end{aligned} \tag{15}$$

where,  $d$  denotes the number of subcellular locations and  $tp$ ,  $tn$ ,  $fp$ , and  $fn$  indicate the number of true positive, true negative, false positive, and false negative instances, respectively.

### 2.2.1. Learning Hyperparameters

For all datasets, to prevent overfitting in tuning hyperparameters, they were learned from a comprehensive dataset, HumB, which is not considered in testing stage. It means that these hyperparameters are considered for all datasets. Since HumB -among the four mentioned datasets- contains both the single label and multi label PSL data, this dataset has been used for tuning task. Following 5-fold cross validation procedure is applied on HumB and hyperparameters were chosen empirically by maximizing the F1 – mean: HumB is divided into 5 equal subsets and PSL-Recommender is trained on union of 4 subsets and one other subset was hold for test the F1 – mean. This process is repeated 5 times, such that each time one of the 5 subsets is used as validation set and other 4 subsets are put together to form a training set.

For each set of hyperparameters, whole 5-fold process is repeated for 20 times and average of F1 – mean has been calculated. Due to the large search space, a grid-search procedure is applied for selecting the hyperparameters.

The weight of similarity measures used to build the protein similarity matrix was picked from 1 to 10 by step of 1. The dimension of latent space,  $r$ , was selected between 1 and the number of subcellular locations by step of 1. The

175 weighting factor for positive observations,  $c$ , was chosen between 5 and 80 by  
step of 1. The number of nearest neighbors for constructing  $N_{k_1}(x_i)$  in equation  
7,  $k_1$ , was selected from 1 to 60 by step of 1. Similarly, The number of nearest  
neighbors for constructing  $N_{k_2}(x_i)$ , in equation 12,  $k_2$ , was selected from 1 to  
60 by step of 1. The variance controlling parameters,  $\lambda_p$  and  $\lambda_l$ , were chosen  
180 form  $\{2^{-5}, 2^{-4}, \dots, 2^1\}$ . Impact factor of nearest neighbors in equation 8,  $\alpha$ , was  
picked from  $\{2^{-5}, 2^{-4}, \dots, 2^2\}$ . Finally, The learning rate of the gradient descent  
criteria,  $\theta$ , was selected from  $\{2^{-5}, 2^{-4}, \dots, 2^0\}$ .

Table 2 represents the learned hyperparameters using HumB dataset. For all  
datasets, these learned hyperparameters are considered to construct the models.

|       | $r$ | $c$ | $k_1$ | $k_2$ | $\lambda_p$ | $\lambda_l$ | $\alpha$ | $\theta$ |
|-------|-----|-----|-------|-------|-------------|-------------|----------|----------|
| Value | 10  | 11  | 4     | 10    | 0.25        | 0.5         | 2        | 1        |

Table 2: Learned hyperparameters based on HumB dataset. ( $r$  is latent space dimension,  $c$  is weighting factor for positive observations,  $k_1$  is the number of nearest neighbors for constructing  $N_{k_1}(x_i)$ ,  $k_2$  is the number of nearest neighbors for constructing  $N_{k_2}(x_i)$ ,  $\lambda_p$  variance controlling parameter of proteins,  $\lambda_l$  variance controlling parameter of subcellular locations,  $\alpha$  is the impact factor of nearest neighbors, and  $\theta$  is the learning rate of the gradient descent criteria)

185

### 3. Results and discussion

PSL-Recommender can be employed to predict the subcellular protein local-  
ization in different species. Accordingly, we evaluated the performance of PSL-  
Recommender on different datasets and compared it to other state-of-the-arts  
190 methods. We further investigated the role of each protein similarity measures  
that are employed by the PSL-Recommender.

#### 3.1. Comparison with the State-of-art method

We have first employed the Hum-mPLoc 3.0 [2] human protein dataset to  
compare the performance of PSL-Recommender to six methods that were in-

195 introduced for protein localization in human. The methods include YLoc+ [6],  
iLoc-Hum [47], WegoLoc [48], mLASSO-Hum [49] and Hum-mPloc 3.0. The  
F1 – score for each location and the ACC and F1 – mean of all methods on  
Hum-mploc 3.0 dataset is depicted in Table 3.

As seen in Table 3, PSL-Recommender significantly outperforms the F1 – mean  
200 and ACC of all other methods improving the best method by 12% in both  
F1 – mean and ACC. Also, in 10 out of 12 subcellular locations, PSL-Recommender  
has the best performance amongst all methods while in the other two locations  
it has the second best performance. The most significant improvements have  
been observed in Centrosome, ER (Endoplasmic Reticulum) and Plasma Mem-  
205 brane showing 17%, 21% and 18% improvement respectively over the second  
best method.

It is only in Endosome that PSL-Recommender shows unsatisfactory results  
(41% F1 – score). This is while other methods also fail to provide good results  
for this location such that the best method (Hum-mPLOC 3.0) only achieves  
210 52% F1 – score. Moreover, for Extracellular, WegoLoc slightly (3%) outper-  
forms PSL-Recommender.

To show the performance of PSL-Recommender on other species we have em-

| Location        | Yloc+ |      |      | iLoc-Human |      |             | WegoLoc |      |             | mLASSO-Hum  |      |             | Hum-mPloc3.0 |      |             | PSL-Recommender |      |             |
|-----------------|-------|------|------|------------|------|-------------|---------|------|-------------|-------------|------|-------------|--------------|------|-------------|-----------------|------|-------------|
|                 | pre   | re   | F1   | pre        | re   | F1          | pre     | re   | F1          | pre         | re   | F1          | pre          | re   | F1          | pre             | re   | F1          |
| Centrosome      | -     | -    | -    | 0          | 0    | 0           | 0.75    | 0.14 | 0.23        | 0.59        | 0.59 | 0.59        | 0.75         | 0.55 | <u>0.63</u> | 0.94            | 0.69 | <b>0.80</b> |
| Cytoplasm       | 0.55  | 0.85 | 0.67 | 0.5        | 0.54 | 0.52        | 0.69    | 0.53 | 0.60        | 0.93        | 0.51 | 0.66        | 0.76         | 0.73 | <u>0.74</u> | 0.81            | 0.78 | <b>0.79</b> |
| Cytoskeleton    | -     | -    | -    | 0          | 0    | 0           | 0.32    | 0.34 | 0.33        | 0.9         | 0.22 | 0.35        | 0.8          | 0.68 | <u>0.74</u> | 0.97            | 0.70 | <b>0.82</b> |
| ER              | 0.71  | 0.12 | 0.21 | 0          | 0    | 0           | 0.73    | 0.2  | 0.31        | 0.74        | 0.49 | <u>0.59</u> | 0.83         | 0.37 | 0.51        | 0.91            | 0.72 | <b>0.80</b> |
| Endosome        | -     | -    | -    | 0          | 0    | 0           | 0.25    | 0.07 | 0.11        | 0.38        | 0.2  | 0.26        | 0.58         | 0.47 | <b>0.52</b> | 0.63            | 0.31 | <u>0.41</u> |
| Extracellular   | 0.39  | 0.85 | 0.54 | 0.62       | 0.62 | 0.62        | 0.67    | 0.77 | <b>0.71</b> | 0.16        | 0.69 | 0.26        | 0.5          | 0.46 | 0.48        | 0.66            | 0.71 | <u>0.68</u> |
| Golgi apparatus | 0.1   | 0.05 | 0.07 | 0.6        | 0.3  | 0.4         | 0.6     | 0.15 | 0.24        | 0.72        | 0.65 | <u>0.68</u> | 0.69         | 0.45 | 0.55        | 0.86            | 0.59 | <b>0.70</b> |
| Lysosome        | 0     | 0    | 0    | 0.5        | 0.13 | 0.2         | 0.2     | 0.13 | 0.15        | 0.55        | 0.75 | 0.63        | 0.71         | 0.63 | <u>0.67</u> | 1               | 0.55 | <b>0.71</b> |
| Mitochondrion   | 0.65  | 0.43 | 0.52 | 0.95       | 0.33 | 0.49        | 0.79    | 0.73 | 0.76        | 0.83        | 0.88 | <u>0.85</u> | 0.78         | 0.75 | 0.76        | 0.93            | 0.86 | <b>0.90</b> |
| Nucleus         | 0.41  | 0.57 | 0.48 | 0.54       | 0.7  | 0.61        | 0.65    | 0.64 | 0.64        | 0.85        | 0.7  | <u>0.76</u> | 0.75         | 0.71 | 0.73        | 0.83            | 0.91 | <b>0.87</b> |
| Peroxisome      | 0.07  | 0.5  | 0.13 | 1          | 0.5  | <u>0.67</u> | 0.5     | 1    | <u>0.67</u> | 0.29        | 1    | 0.44        | 1            | 1    | <b>1</b>    | 1               | 1    | <b>1</b>    |
| Plasma membrane | 0.41  | 0.44 | 0.42 | 0.42       | 0.33 | 0.37        | 0.44    | 0.53 | 0.48        | 0.58        | 0.56 | <u>0.57</u> | 0.65         | 0.44 | 0.52        | 0.77            | 0.73 | <b>0.75</b> |
| ACC             | 0.45  |      |      | 0.41       |      |             | 0.50    |      |             | <u>0.65</u> |      |             | 0.63         |      |             | <b>0.77</b>     |      |             |
| F1-mean         | 0.34  |      |      | 0.32       |      |             | 0.44    |      |             | 0.56        |      |             | <u>0.65</u>  |      |             | <b>0.77</b>     |      |             |

Table 3: Comparison of PSL-Recommender on Human proteins dataset(Hum-mPloc 3.0) with other methods.

ployed previously introduced datasets that include proteins from animals and eukaryotes. We then compared the results to five state-of-the-art methods including [2, 6, 8, 33, 50]. The results are depicted in Table 4.

|                   | BaCelLo                   | Höglund                   | DBMloc                    |
|-------------------|---------------------------|---------------------------|---------------------------|
| YLoc-LowRes       | 0.79/0.75                 | -                         | -                         |
| YLoc-HighRes      | 0.74/0.69                 | 0.56/0.34                 | -                         |
| YLoc+             | 0.58/0.67                 | 0.53/0.37                 | 0.64/0.68                 |
| MultiLoc2-LowRes  | 0.73/0.76                 | -                         | -                         |
| MultiLoc2-HighRes | 0.68/0.71                 | 0.57/0.41                 | -                         |
| BaCelLo           | 0.64/0.66                 | -                         | -                         |
| PMLPR             | -                         | <u>0.64</u> /0.38         | 0.72/0.67                 |
| Hum-mPloc 3.0     | <u>0.86</u> / <u>0.84</u> | <u>0.64</u> / <u>0.59</u> | <u>0.87</u> / <u>0.84</u> |
| PSL-Recommender   | <b>0.93/0.92</b>          | <b>0.91/0.88</b>          | <b>0.88/0.85</b>          |

Table 4: Comparison of PSL-Recommender ACC/F1 – mean on other species proteins datasets with state-of-the-art methods.

As seen in Table 4, PSL-Recommender outperforms all methods in all datasets by both F1 – mean and ACC. In Höglund IDS animals dataset, PSL-Recommender significantly outperforms the second best method by 27% and 29% in F1 – mean and ACC respectively. In BaCelLo IDS animals dataset, the improvement over the second best method is 7% in F1 – mean and 8% in ACC, while in DBMloc dataset, PSL-Recommender slightly improves the second best method by 1% in both F1 – mean and ACC.

In order to compare PSL-Recommender performance with some other prominent works like SherLoc2 [5], WoLF PSORT [4], and Euk-mPloc [17], we have investigated AVG and ACC2 of PSL-Recommender results over two data set BaCelLo IDS animals and Höglund IDS animals and compared them with reported results in SherLoc2 paper which is represented in Table 5.

Table 6 is also demonstrate great performance of PSL-Recommender with re-

230 spect to AVG and ACC2. PSL-Recommender shown great improvement by 16%  
in AVG and 25% in ACC2 over BaCelLo IDS dataset and also outperforming  
results over Höglund IDS dataset with 47% and 40% improvement over AVG  
and ACC2 respectively.

235 It also worth mentioning that, for PSL prediction problem, to the best of  
our knowledge, PMLPR [8] is the only recommender system based method  
that employs the well-known network-based inference(NBI) [51] approach. As  
seen in Table 4, PSL-Recommender outperforms PMLPR by 50% and 18% in  
F1 – mean, and also 27% and 16% in ACC on Höglund and DBMloc datasets,  
repectively.

| Method          | BaCelLo           | Höglund          |
|-----------------|-------------------|------------------|
| PSL-Recommender | <b>0.92/0.96</b>  | <b>0.86/0.97</b> |
| SherLoc2        | <u>0.76/0.71</u>  | <u>0.39/0.54</u> |
| MultiLoc2       | 0.75/0.68         | 0.38/0.57        |
| WoLF PSORT      | 0.69/ <u>0.71</u> | 0.24/0.56        |
| Euk-mPloc       | 0.48/0.58         | 0.18/0.22        |

Table 5: Comparisons of PSL-Recommender, SherLoc2, MultiLoc2, WoLF PSORT, and Euk-mPloc performance with respect to AVG/ACC2.

| Features    | BaCelLo   | Höglund   | DBMLoc    | Hum-mPloc 3.0 |
|-------------|-----------|-----------|-----------|---------------|
| PSSM        | 0.69/0.53 | 0.63/0.26 | 0.81/0.77 | 0.33/0.17     |
| STRING      | -         | -         | -         | 0.44/0.40     |
| GO          | 0.93/0.91 | 0.90/0.87 | 0.86/0.84 | 0.76/0.75     |
| PSSM+STRING | -         | -         | -         | 0.46/0.37     |
| GO +PSSM    | 0.93/0.92 | 0.91/0.88 | 0.88/0.85 | 0.77/0.76     |
| GO+STRING   | -         | -         | -         | 0.78/0.77     |
| All         | 0.93/0.92 | 0.91/0.88 | 0.88/0.85 | 0.77/0.77     |

Table 6: PSL-Recommender ACC/F1 – mean comparisons by using different features.



### 240 3.2. Impact of each similarity matrix

The proteins similarity matrix is used for neighborhood regularization and also the prediction step. To acquire this matrix PSL-Recommender combines three sources of protein similarity measures (PSSM similarity, String-DB interactions similarity and GO terms semantic similarity) using weighted averaging.

245 The weights are acquired through the learning process.

To investigate the impact of different similarity measures, we repeated previous experiments using different combination of similarity measures. Table 6. shows the result of each combination on all datasets. As can be seen in Table 6., those combinations excluding the GO terms semantic similarities do not provide reliable predictions showing that GO terms semantic similarities play an important role in protein subcellular localization.

It should be noted that GO terms are not available for all proteins. In the absence of GO terms semantic similarities, PLS-Recommender is still able to provide acceptable results for DBMLoc and BacelLo datasets but its performance significantly drops for Höglund and Hum-mPloc 3.0.

255 Moreover, the usage of String protein-protein interaction scores is only limited to datasets that contain proteins from single species. Since DBMLoc, BacelLo, and Höglund datasets contain proteins from multiple species we were unable to use String interaction scores in these datasets.

### 260 3.3. Stability of the PSL-Recommender

Choosing appropriate hyperparameters plays a vital role in the performance of a model. As mentioned in section 2.2.1, the models for all of the datasets constructed by same set of hyperparameters based on HumB dataset (Table 2). The results of using these hyperparameters represented on Table 3, Table 4, and Table 5 for all datasets.

265 In order to investigate the stability of the models, for each datasets, the hyperparameters are selected according to their training set by applying 5-fold cross validation with similar procedure which is explained in section 2.2.1. By considering different hyperparameters, F1 – mean reached to 0.92, 0.90, and 0.89 and

270 ACC get to 0.94, 0.92, and 0.89 for BaCelLo IDS, Höglund IDS, and DBMloc,  
respectively.

For each datasets, by applying selected hyperparameters with respect to their  
training set, the F1 – mean and ACC can be increased only by 2 percent. It can  
be concluded that, despite large number of hyperparameters PSL-Recommender  
275 is a stable method for PSL prediction.

#### 4. Conculusion

In the absence of efficient experimental methods, computational tools play  
an important role for predicting protein subcellular localizations. Yet, there  
is still much room for improving the prediction accuracy of these methods.  
280 In this paper, we introduced PSL-Recommender, a recommender system that  
employs logistic matrix factorization for efficient prediction of protein subcel-  
lular localization. By evaluating on human and animals datasets it was shown  
that PSL-Recommender significantly outperforms other state-of-the-art meth-  
ods. However, we believe that the performance of PSL-Recommender can be  
285 improved further by employing a better approach for searching the parameter  
space. The standalone version of PSL-Recommender and all the datasets are  
available online at: <https://github.com/RJamali/PSL-Recommender>

#### Acknowledgements

This work is supported by Iran National Science Foundation.

#### 290 References

- [1] R. Nair, B. Rost, Better prediction of sub-cellular localization by combining  
evolutionary and structural information, *Proteins: Structure, Function,  
and Bioinformatics* 53 (4) (2003) 917–930.

- 295 [2] H. Zhou, Y. Yang, H.-B. Shen, Hum-mploc 3.0: prediction enhancement of human protein subcellular localization through modeling the hidden correlations of gene ontology and functional domain features, *Bioinformatics* 33 (6) (2016) 843–853.
- 300 [3] A. Höglund, P. Dönnies, T. Blum, H.-W. Adolph, O. Kohlbacher, Multi-loc: prediction of protein subcellular localization using n-terminal targeting sequences, sequence motifs and amino acid composition, *Bioinformatics* 22 (10) (2006) 1158–1165.
- [4] P. Horton, K.-J. Park, T. Obayashi, N. Fujita, H. Harada, C. Adams-Collier, K. Nakai, Wolf psort: protein localization predictor, *Nucleic acids research* 35 (suppl.2) (2007) W585–W587.
- 305 [5] S. Briesemeister, T. Blum, S. Brady, Y. Lam, O. Kohlbacher, H. Shatkay, Sherloc2: a high-accuracy hybrid method for predicting subcellular localization of proteins, *Journal of proteome research* 8 (11) (2009) 5363–5366.
- [6] S. Briesemeister, J. Rahnenführer, O. Kohlbacher, Going from where to whyinterpretable prediction of protein subcellular localization, *Bioinformatics* 26 (9) (2010) 1232–1238.
- 310 [7] X. Cheng, X. Xiao, K.-C. Chou, ploc-mhum: predict subcellular localization of multi-location human proteins via general pseAAC to winnow out the crucial go information, *Bioinformatics* 34 (9) (2017) 1448–1456.
- [8] E. M. Mehrabad, R. Hassanzadeh, C. Eslahchi, Pmlpr: A novel method for predicting subcellular localization based on recommender systems, *Scientific reports* 8 (1) (2018) 12006.
- 315 [9] H. Bannai, Y. Tamada, O. Maruyama, K. Nakai, S. Miyano, Extensive feature detection of n-terminal protein sorting signals, *Bioinformatics* 18 (2) (2002) 298–305.

- 320 [10] K.-C. Chou, H.-B. Shen, Cell-ploc: a package of web servers for predicting subcellular localization of proteins in various organisms, *Nature protocols* 3 (2) (2008) 153.
- [11] D. Xie, A. Li, M. Wang, Z. Fan, H. Feng, Locsvmpsi: a web server for subcellular localization of eukaryotic proteins using svm and profile of psi-  
325 blast, *Nucleic acids research* 33 (suppl\_2) (2005) W105–W110.
- [12] K.-C. Chou, Y.-D. Cai, Prediction and classification of protein subcellular locationsequence–order effect and pseudo amino acid composition, *Journal of cellular biochemistry* 90 (6) (2003) 1250–1260.
- [13] B. R. King, C. Guda, ngloc: an n-gram-based bayesian method for estimat-  
330 ing the subcellular proteomes of eukaryotes, *Genome biology* 8 (5) (2007) R68.
- [14] R. Nair, B. Rost, Inferring sub-cellular localization through automated lexical analysis, *Bioinformatics* 18 (suppl\_1) (2002) S78–S86.
- [15] H. Shatkay, A. Höglund, S. Brady, T. Blum, P. Dönnes, O. Kohlbacher, Sherlock: high-accuracy prediction of protein subcellular localization by integrating text and protein sequence data, *Bioinformatics* 23 (11) (2007) 1410–1417.  
335
- [16] S. Brady, H. Shatkay, Epiloc: a (working) text-based system for predicting protein subcellular location, in: *Pacific Symposium on Biocomputing*, World Scientific, 2008, pp. 604–615.  
340
- [17] K.-C. Chou, H.-B. Shen, Euk-mploc: a fusion classifier for large-scale eukaryotic protein subcellular location prediction by incorporating multiple sites, *Journal of Proteome Research* 6 (5) (2007) 1728–1734.
- [18] K. Lee, H.-Y. Chuang, A. Beyer, M.-K. Sung, W.-K. Huh, B. Lee, T. Ideker, Protein networks markedly improve prediction of subcellular localization in multiple eukaryotic species, *Nucleic acids research* 36 (20) (2008) e136–e136.  
345

- [19] W.-L. Huang, C.-W. Tung, S.-W. Ho, S.-F. Hwang, S.-Y. Ho, Proloc-go: utilizing informative gene ontology terms for sequence-based prediction of protein subcellular localization, BMC bioinformatics 9 (1) (2008) 80.
- 350
- [20] C. J. Shin, S. Wong, M. J. Davis, M. A. Ragan, Protein-protein interaction as a predictor of subcellular location, BMC systems biology 3 (1) (2009) 28.
- [21] X. Xiao, Z.-C. Wu, K.-C. Chou, iloc-virus: A multi-label learning classifier for identifying the subcellular localization of virus proteins with both single and multiple sites, Journal of theoretical biology 284 (1) (2011) 42–51.
- 355
- [22] J. He, H. Gu, W. Liu, Imbalanced multi-modal multi-label learning for subcellular localization prediction of human proteins with both single and multiple sites, PloS one 7 (6) (2012) e37155.
- [23] R. Simha, H. Shatkay, Protein (multi-) location prediction: using location inter-dependencies in a probabilistic framework, Algorithms for Molecular Biology 9 (1) (2014) 8.
- 360
- [24] K. Nakai, P. Horton, Psort: a program for detecting sorting signals in proteins and predicting their subcellular localization, Trends in biochemical sciences 24 (1) (1999) 34–35.
- 365
- [25] O. Emanuelsson, H. Nielsen, S. Brunak, G. Von Heijne, Predicting subcellular localization of proteins based on their n-terminal amino acid sequence, Journal of molecular biology 300 (4) (2000) 1005–1016.
- [26] S. Sinha, On counting position weight matrix matches in a sequence, with application to discriminative motif finding, Bioinformatics 22 (14) (2006) e454–e463.
- 370
- [27] H. Nakashima, K. Nishikawa, Discrimination of intracellular and extracellular proteins using amino acid composition and residue-pair frequencies, Journal of molecular biology 238 (1) (1994) 54–61.

- 375 [28] R. Francesco, R. Lior, S. Bracha, Introduction to recommender systems handbook, *recommendersystems handbook* (2011).
- [29] Y. Liu, M. Wu, C. Miao, P. Zhao, X.-L. Li, Neighborhood regularized logistic matrix factorization for drug-target interaction prediction, *PLoS computational biology* 12 (2) (2016) e1004760.
- 380 [30] H. Liu, G. Ren, H. Hu, L. Zhang, H. Ai, W. Zhang, Q. Zhao, Lpi-nrlmf: lncrna-protein interaction prediction by neighborhood regularized logistic matrix factorization, *Oncotarget* 8 (61) (2017) 103975.
- [31] X. Zheng, H. Ding, H. Mamitsuka, S. Zhu, Collaborative matrix factorization with multiple similarities for predicting drug-target interactions, in: *Proceedings of the 19th ACM SIGKDD international conference on*  
385 *Knowledge discovery and data mining*, ACM, 2013, pp. 1025–1033.
- [32] H. Luo, M. Li, S. Wang, Q. Liu, Y. Li, J. Wang, Computational drug repositioning using low-rank matrix approximation and randomized algorithms, *Bioinformatics* 34 (11) (2018) 1904–1912.
- 390 [33] T. Blum, S. Briesemeister, O. Kohlbacher, Multiloc2: integrating phylogeny and gene ontology terms improves subcellular protein localization prediction, *BMC bioinformatics* 10 (1) (2009) 274.
- [34] A. Mnih, R. R. Salakhutdinov, Probabilistic matrix factorization, in: *Advances in neural information processing systems*, 2008, pp. 1257–1264.
- 395 [35] C. C. Johnson, Logistic matrix factorization for implicit feedback data, *Advances in Neural Information Processing Systems* 27.
- [36] M. Hao, S. H. Bryant, Y. Wang, Predicting drug-target interactions by dual-network integrated logistic matrix factorization, *Scientific reports* 7 (2017) 40376.
- 400 [37] M. Ashburner, C. A. Ball, J. A. Blake, D. Botstein, H. Butler, J. M. Cherry, A. P. Davis, K. Dolinski, S. S. Dwight, J. T. Eppig, et al., Gene ontology: tool for the unification of biology, *Nature genetics* 25 (1) (2000) 25.

- [38] G. D. Stormo, T. D. Schneider, L. Gold, A. Ehrenfeucht, Use of the perceptron algorithm to distinguish translational initiation sites in *e. coli*, *Nucleic acids research* 10 (9) (1982) 2997–3011.
- 405
- [39] D. Szklarczyk, A. Franceschini, S. Wyder, K. Forslund, D. Heller, J. Huerta-Cepas, M. Simonovic, A. Roth, A. Santos, K. P. Tsafou, et al., String v10: protein–protein interaction networks, integrated over the tree of life, *Nucleic acids research* 43 (D1) (2014) D447–D452.
- [40] S. F. Altschul, T. L. Madden, A. A. Schäffer, J. Zhang, Z. Zhang, W. Miller, D. J. Lipman, Gapped blast and psi-blast: a new generation of protein database search programs, *Nucleic acids research* 25 (17) (1997) 3389–3402.
- 410
- [41] M. S. Scott, S. J. Calafell, D. Y. Thomas, M. T. Hallett, Refining protein subcellular localization, *PLoS computational biology* 1 (6) (2005) e66.
- [42] E. W. Sayers, T. Barrett, D. A. Benson, E. Bolton, S. H. Bryant, K. Canese, V. Chetvernin, D. M. Church, M. Dicuccio, S. Federhen, et al., Database resources of the national center for biotechnology information, *Nucleic acids research* 38 (suppl.1) (2009) D5–D16.
- 415
- [43] G. K. Mazandu, E. R. Chimusa, M. Mbiyavanga, N. J. Mulder, A-dago-fun: an adaptable gene ontology semantic similarity-based functional analysis tool, *Bioinformatics* 32 (3) (2015) 477–479.
- 420
- [44] J. Duchi, E. Hazan, Y. Singer, Adaptive subgradient methods for online learning and stochastic optimization, *Journal of Machine Learning Research* 12 (Jul) (2011) 2121–2159.
- [45] R. Casadio, P. L. Martelli, A. Pierleoni, The prediction of protein subcellular localization from sequence: a shortcut to functional genome annotation, *Briefings in Functional Genomics and Proteomics* 7 (1) (2008) 63–73.
- 425
- [46] G. Tsoumakas, I. Katakis, Multi-label classification: An overview, *International Journal of Data Warehousing and Mining (IJDWM)* 3 (3) (2007) 1–13.
- 430

- [47] K.-C. Chou, Z.-C. Wu, X. Xiao, iloc-hum: using the accumulation-label scale to predict subcellular locations of human proteins with both single and multiple sites, *Molecular Biosystems* 8 (2) (2012) 629–641.
- [48] S.-M. Chi, D. Nam, Wegoloc: accurate prediction of protein subcellular localization using weighted gene ontology terms, *Bioinformatics* 28 (7) (2012) 1028–1030.
- [49] S. Wan, M.-W. Mak, S.-Y. Kung, mlasso-hum: A lasso-based interpretable human-protein subcellular localization predictor, *Journal of theoretical biology* 382 (2015) 223–234.
- [50] A. Pierleoni, P. L. Martelli, P. Fariselli, R. Casadio, Bacello: a balanced subcellular localization predictor, *Bioinformatics* 22 (14) (2006) e408–e416.
- [51] T. Zhou, J. Ren, M. Medo, Y.-C. Zhang, Bipartite network projection and personal recommendation, *Physical Review E* 76 (4) (2007) 046115.
